# Supplementary material for: Reorganization of the Brain Extracellular Matrix in Hippocampal Sclerosis
Source: MDPI journal article supplement (doi:10.3390/ijms23158197), 2022-07-25
Supplement: s1 [file s1]

## Supplemental figures

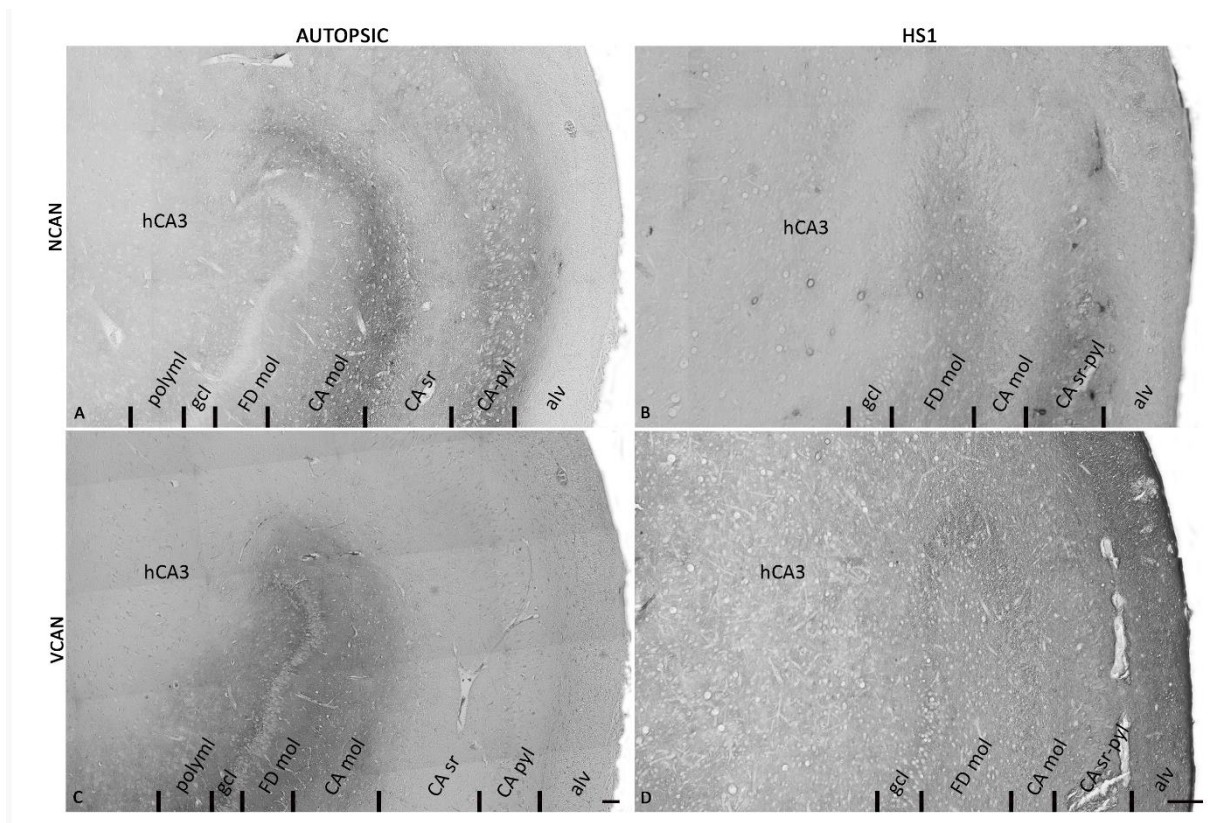

**Supplemental Figure S1.** High magnification images of NCAN and VCAN expression in FD and CA fields in autopsic hippocampus and HS1.

The NCAN and VCAN are expressed diffusely in all regions of hippocampi. NCAN expression in autopsic hippocampi is most prominent in the molecular and pyramidal layers of CA, and at a low level in all other layers except the granular cell layer (A). In HS1, due to gliosis and changes in overall histoarchitecture, layers are not easy to recognize and delineate. Still, the downregulation of the expression of NCAN in the molecular layer of CA and upregulation of expression in the molecular layer in FD is clear (B). VCAN is primarily expressed in FD in autopsic hippocampi, in molecular and in polymI layers, and at a very low level in the gcl (C). In HS1, VCAN is upregulated and expressed homogeneously through all layers and regions of hippocampi (D).

polymI- polymorphic layer, FD- fascia dentata, mol- molecular layer, gcl- granular cell layer, hCA3- hilar CA3 field, CA- Cornu Ammonis, alv- alveus, sr- stratum radiatum, pyl- pyramidal layer. The scale bars in C (refers also to A) and D (refers also to B) represent 100  $\mu$ m.

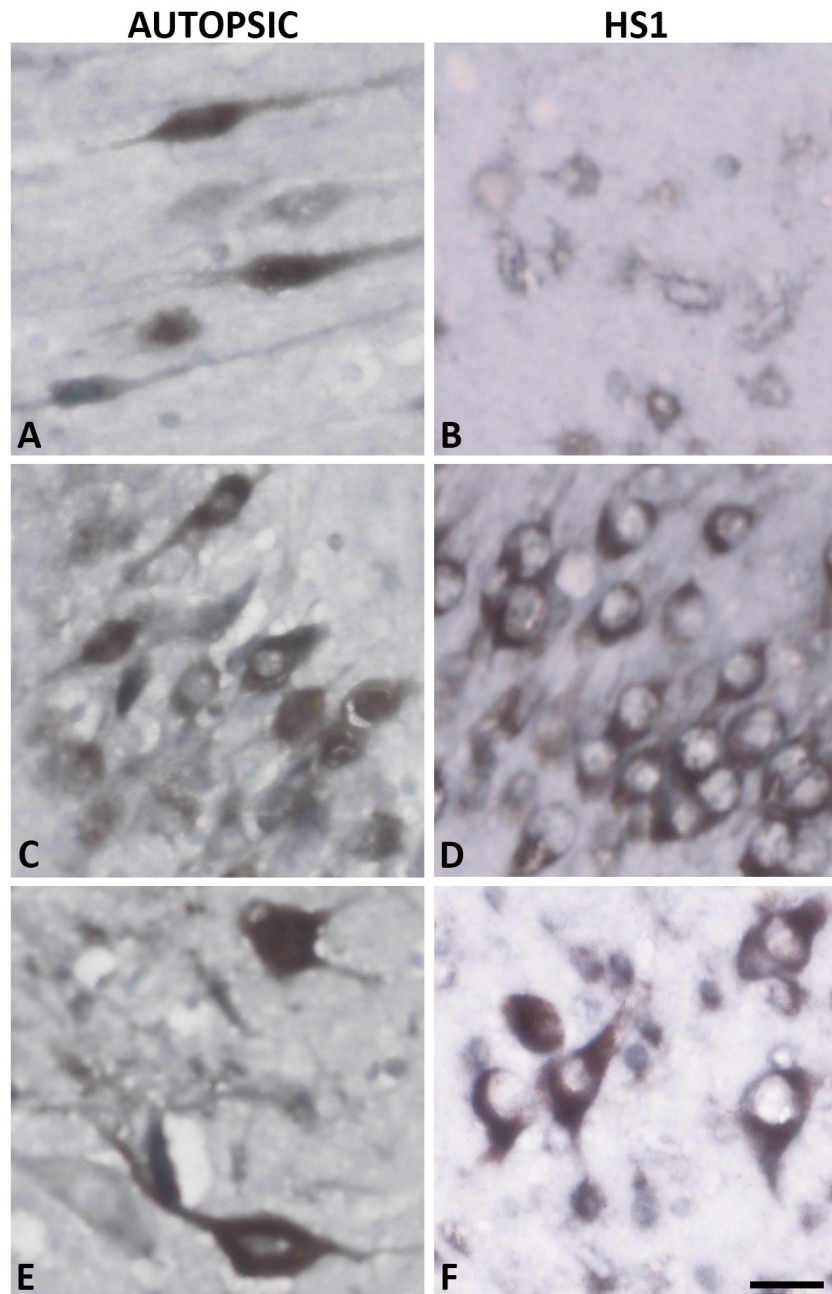

**Supplemental Figure S2.** High magnification images of AGG expression in the PNNs in the autopsy hippocampus and HS1.

The images of high magnification present AGG expression in PNNs of the autopsy hippocampus, in the polymorphic layer (A), around cell soma in granular cell layer (C), and the AGG expression in PNNs of the pyramidal layer of CA (E). However, the AGG expression in the HS1 is qualitatively different in these layers, we don't find differentiated forms of PNNs, but predominantly an AGG expression around the cell soma in gcl and pyl, delineating the cell soma shape changes from triangular and fusiform to more round (B, D, and F). The magnification scale bar indicates 20  $\mu$ m and refers to A-F.

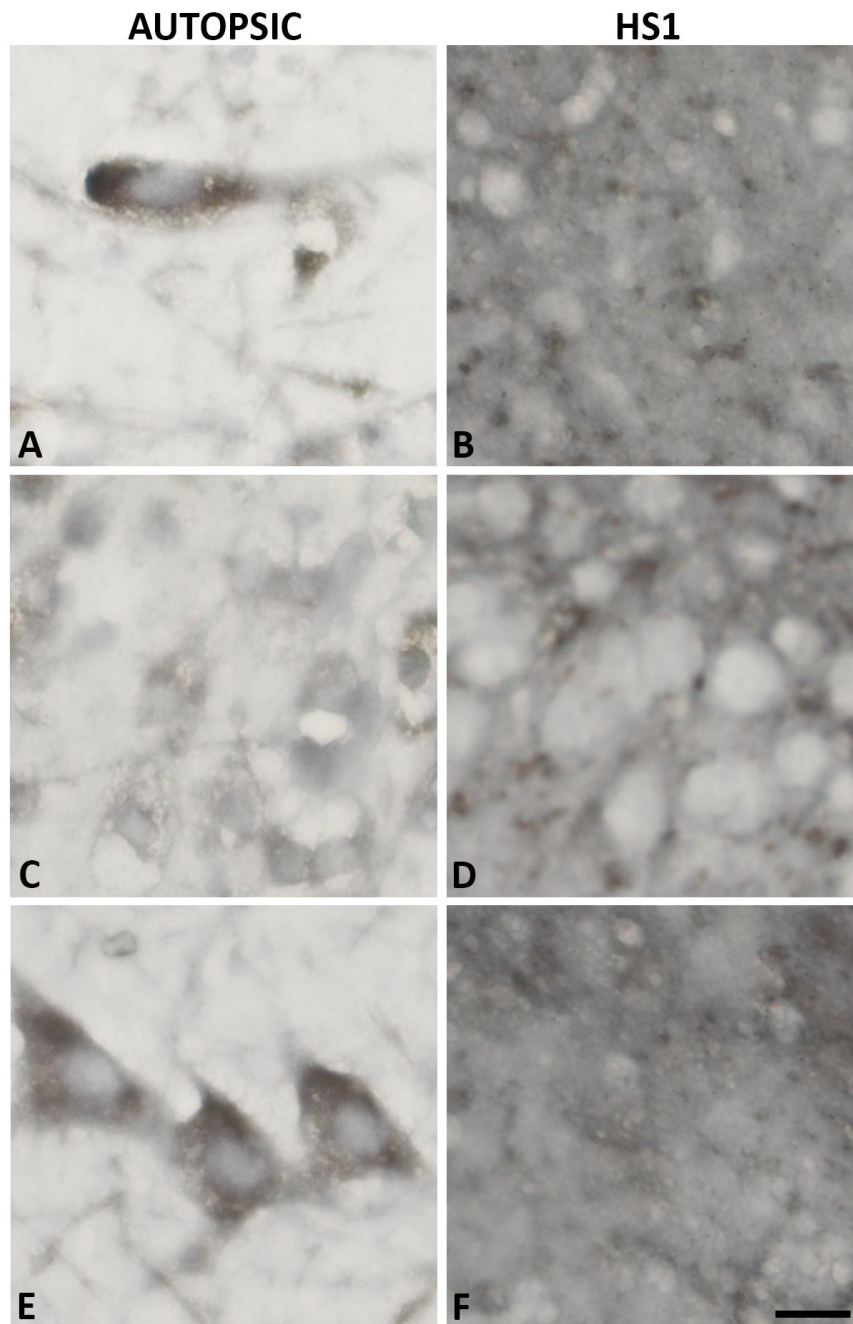

**Supplemental Figure S3.** High magnification images of WFA-specific staining of the PNNs in the autopsic hippocampus and WFA-specific staining of the diffusely expressed glycoproteins and proteoglycans in HS1.

The images of high magnification present WFA-specific glycosylation of glycoproteins and proteoglycans expressed in PNNs of the autopsic hippocampus, particularly in the polymorphic layer (A), and in the PNNs of the pyramidal layer of CA (E), while WFA staining is not observed in gcl (C). In the HS1, upregulation of WFA-specific glycosylation of diffusely expressed glycoproteins and proteoglycans is observed, and degradation or absence of PNNs (B, D, and F). The magnification scale bar indicates 20  $\mu$ m and refers to A-F.



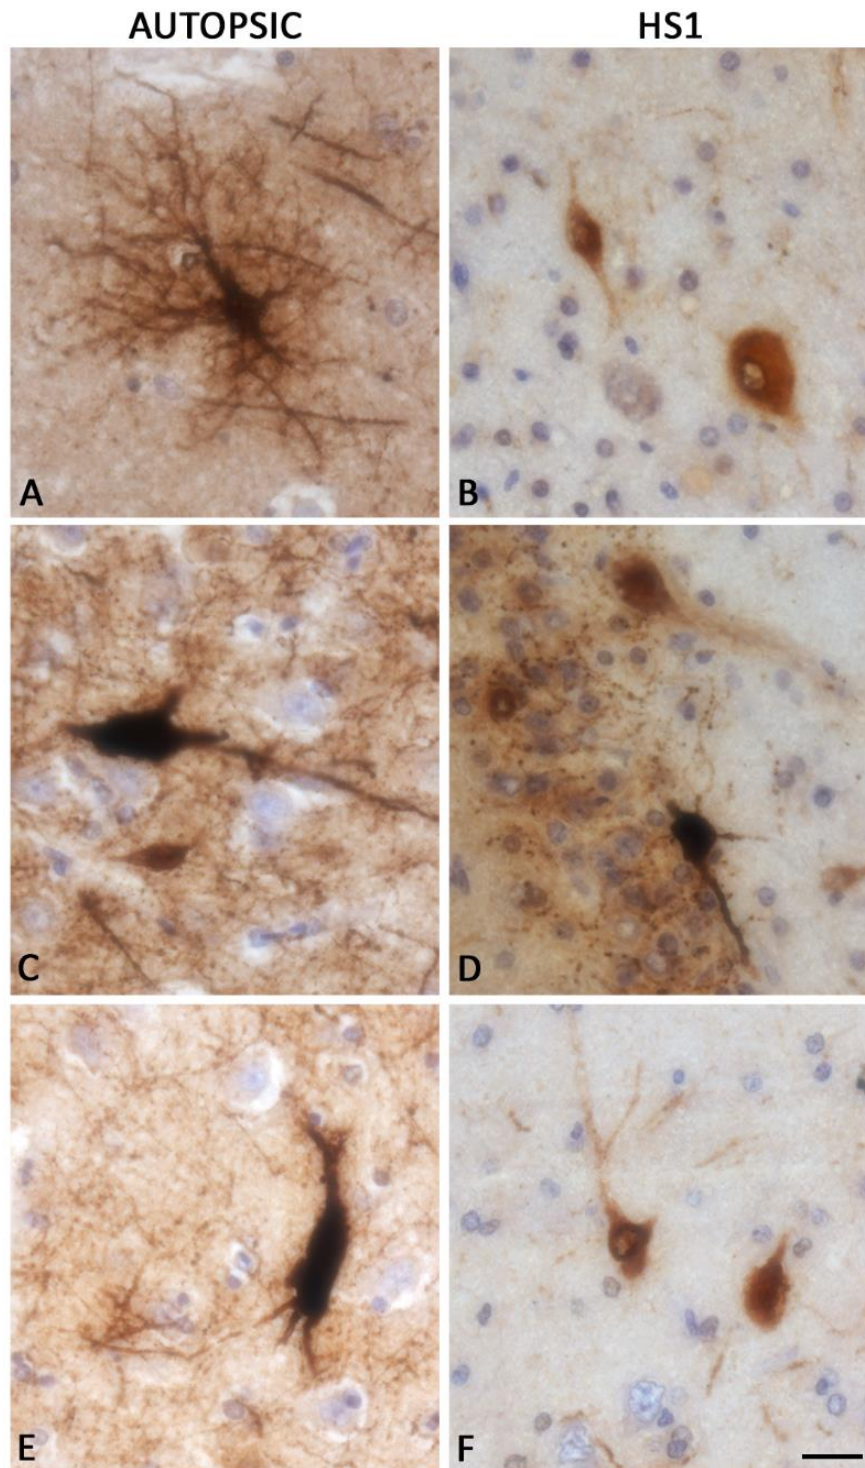

**Supplemental Figure S4.** Morphology of parvalbumin immunoreactive neurons in autopsic hippocampus and HS1.

Changes of neurons' morphology and PV-immunoreactivity found in hippocampal sclerosis (right column of images) compared to controls (left column of images). The cell soma of PV neurons in pyramidal layer of autopsic hippocampi are sharply outlined and mostly pyramidal, but stellate, (A), bipolar (C), fusiform (E) are also present. In HS1, PARV-ir neurons are small, oval shaped, faintly ir, and their dendrites are rarely visible and regularly aspiny (B, D, F). The scale bar indicates 20  $\mu$ m and refers to A-C.

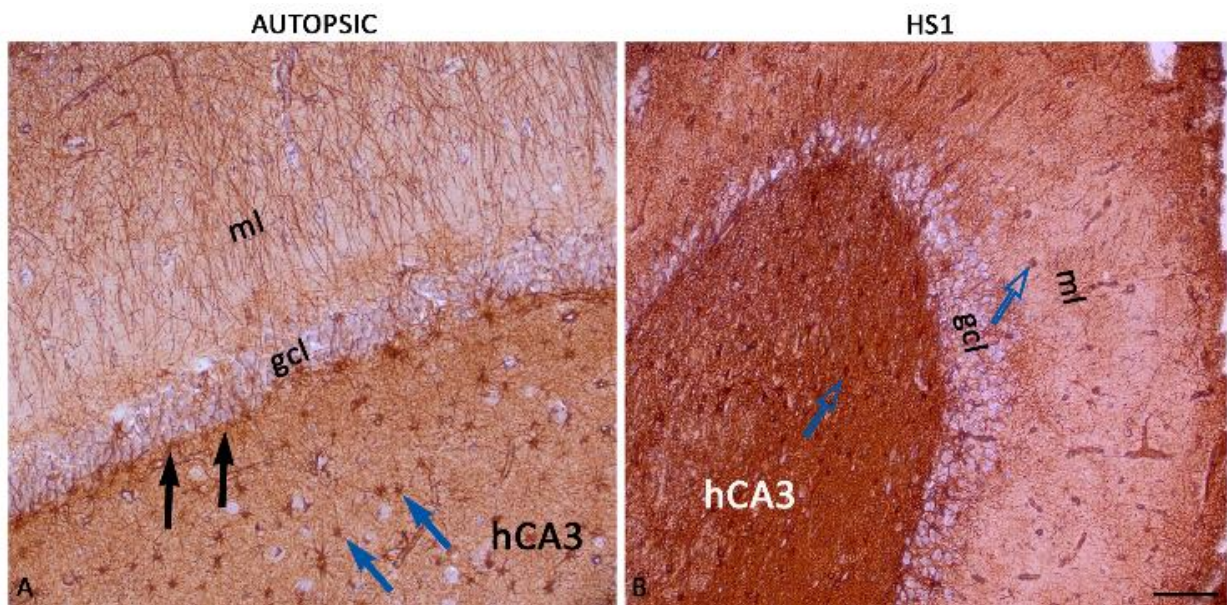

**Supplemental Figure S5.** Glial fibrillary acidic protein expression in autopsic hippocampus and gliosis in HS1.

GFAP expression in autopsic hippocampus (A) and HS1 (B). The severe diffuse reactive astrogliosis is best appreciated in the CA1 and hCA3 (B) fields of HS1 cases. The GFAP-immunoreactive fibers in this layer, seen in healthy hippocampi, are rarely visible in HS1 (A and B). The plexiform layer of FD consists of a single layer of astrocytes (black arrows in A), which is not discernible in HS1 (B). Reduced branching and size of astrocytes are seen in HS1 (empty blue arrows in B) compared to healthy controls (blue arrows in A).

GFAP- glial fibrillary acidic protein, mol- molecular layer, gcl- granular cell layer, hCA3- hilar CA3 field. The scale bar indicates 100  $\mu\text{m}$ .

**Supplemental Table S1.** Semiquantitative analysis of WFA staining intensity.

Each row represents one microscopic slide of one specimen; numbers in brackets represent the scores for each region of interest: '0' for none, '1' for vague, '2' for mild, '3' for moderate, '4' for severe, or '5' for intense immunoreactivity.

|                 | hCA3 | FD mol | CA mol | CA sr-pyl | alv |
|-----------------|------|--------|--------|-----------|-----|
| <b>Autopsic</b> |      |        |        |           |     |
| 1.              | 2    | 1      | 3      | 2         | 4   |
| 2.              | 2    | 1      | 2      | 2         | 4   |
| 3.              | 2    | 1      | 3      | 2         | 4   |
| 4.              | 2    | 1      | 3      | 2         | 4   |
| 5.              | 1    | 1      | 3      | 1         | 4   |
| 6.              | 2    | 1      | 3      | 2         | 4   |
| 7.              | 1    | 1      | 3      | 2         | 4   |
| 8.              | 1    | 1      | 2      | 3         | 4   |
| 9.              | 1    | 1      | 3      | 2         | 4   |
| 10.             | 2    | 1      | 3      | 2         | 4   |
| <b>HS 1</b>     |      |        |        |           |     |
| 1.              | 3    | 2      | 4      | 3         | 5   |
| 2.              | 4    | 2      | 4      | 4         | 5   |
| 3.              | 4    | 3      | 4      | 3         | 5   |
| 4.              | 4    | 2      | 5      | 4         | 5   |
| 5.              | 3    | 2      | 4      | 3         | 5   |
| 6.              | 4    | 2      | 5      | 4         | 5   |
| 7.              | 3    | 2      | 5      | 4         | 5   |
| 8.              | 4    | 2      | 5      | 4         | 5   |
| 9.              | 4    | 3      | 5      | 4         | 5   |
| 10.             | 4    | 3      | 5      | 4         | 5   |
| 11.             | 4    | 2      | 4      | 2         | 5   |
| 12.             | 4    | 2      | 4      | 4         | 5   |

**Supplemental Table S2.** Clinical details of HS1 patients.

**Abbreviations:** CBZ-CR-carbamazepine controlled released, LEV-levetiracetam, LTG-lamotrigine, CBZ-carbamazepine, OXC-oxcarbazepine, VPA-valproate, MPB-methyphenobarbital, CLB-clobazam, PRM-primidone, SUL-sultiame, TPM-topiramate, CNZ-clonazepam

**Clinical semiology:** all patients had typical clinical presentation of mesial temporal lobe epilepsy (MTLE) – focal (nonmotor seizures with impaired awareness) with evolution to bilateral tonic-clonic seizures. Considering detailed clinical semiology of focal seizures, 10 patients had focal autonomic impaired awareness seizures, 2 patients had focal cognitive impaired awareness seizures, and 1 patient had focal sensory impaired awareness seizure.

| SEX    | Age at surgery (years) | Side  | Epilepsy duration (years) | Febrile convulsion | Comorbidities                                        | Clinical semiology                                                                                               | Number of antiepileptic drugs during disease course | Number of antiepileptic drugs 1 year before surgery | Old antiepileptic drugs 1 year before surgery | New antiepileptic drugs 1 year before surgery | Number of attacks before surgery | Post op. Outcome-Engel |
|--------|------------------------|-------|---------------------------|--------------------|------------------------------------------------------|------------------------------------------------------------------------------------------------------------------|-----------------------------------------------------|-----------------------------------------------------|-----------------------------------------------|-----------------------------------------------|----------------------------------|------------------------|
| Female | 37                     | left  | 21                        | No                 | Depression                                           | Epigastric aura followed by impaired awareness, speech arrest, postictal confusion                               | 7                                                   | 3                                                   | CBZ-CR                                        | LEV, LTG                                      | 1 per month                      | 1                      |
| Male   | 64                     | left  | 58                        | NA                 | Learning difficulties in school, Parkinson's disease | Epigastric aura, followed by impaired awareness and orolimentary automatisms, speech arrest, postictal confusion | 6                                                   | 4                                                   | CBZ, VPA                                      | OXC, LTG                                      | Few every week                   | 1                      |
| Male   | 42                     | left  | 37                        | NA                 | Depression                                           | Epigastric aura, followed by impaired awareness and orolimentary automatisms, speech arrest, postictal confusion | 4                                                   | 4                                                   | VPA, MPB                                      | LTG, OXC                                      | Few every/per week               | 2                      |
| Male   | 25                     | left  | 18                        | No                 | No                                                   | Epigastric aura, followed by impaired awareness and orolimentary automatisms, speech arrest                      | NA                                                  | 4                                                   | CLB, PRM, VPA                                 | OXC                                           | 1 per month                      | 1                      |
| Female | 42                     | right | 32                        | NA                 | No                                                   | Olfactory aura (hallucinations), followed by impaired awareness, and gestural automatisms with the upper limbs   | NA                                                  | 2                                                   | SUL                                           | OXC                                           | 2-3 per month                    | 1                      |
| Female | 38                     | left  | 33                        | Yes                | No                                                   | Epigastric aura followed by impaired                                                                             | 7                                                   | 4                                                   | CBZ-CR, CLB                                   | LTG, LEV                                      | 2-3 per month                    | 1                      |

|        |    |       |    |     |                                                                  |                                                                                                                   |   |   |          |               |                      |   |
|--------|----|-------|----|-----|------------------------------------------------------------------|-------------------------------------------------------------------------------------------------------------------|---|---|----------|---------------|----------------------|---|
|        |    |       |    |     |                                                                  | awareness and speech arrest                                                                                       |   |   |          |               |                      |   |
| Female | 57 | right | 45 | No  | No                                                               | Focal cognitive (déjà-vu) impaired awareness seizure, gestural automatisms with the upper limbs                   | 9 | 2 | MPB      | OXC           | More than 1 per week | 1 |
| Female | 32 | right | 22 | No  | Perinatal asphyxia, Speech difficulties in childhood, Depression | Epigastric aura, followed by impaired awareness and oroalimentary automatisms                                     | 6 | 4 | MPB, CLB | LTG, OXC      | daily                | 2 |
| Male   | 42 | left  | 10 | Yes | Developmental psychomotor delay, Autism spectrum disorder        | Epigastric aura, followed by impaired awareness and oroalimentary automatisms, speech arrest, postictal confusion | 7 | 4 | MPB, VPA | LEV, TPM      | 2-3 per month        | 1 |
| Male   | 49 | right | 24 | No  | No                                                               | Epigastric aura, followed by impaired awareness and oroalimentary automatisms, postictal confusion                | 5 | 3 | VPA      | OXC, LTG      | 1 per week           | 1 |
| Female | 34 | left  | 32 | Yes | No                                                               | Epigastric aura, followed by impaired awareness and oroalimentary automatisms, speech arrest, postictal confusion | 6 | 4 | MPB, CNZ | OXC, LTG      | 1-2per week          | 1 |
| Male   | 24 | left  | 22 | No  | No                                                               | Epigastric aura, followed by impaired awareness and oral automatisms, postictal confusion                         | 6 | 3 |          | LEV, LTG, OXC | 1 in a few months    | 1 |
| Male   | 45 | left  | 37 | No  | No                                                               | Focal cognitive (déjà-vu) impaired awareness seizure, with oral automatisms, speech arrest                        | 6 | 4 | MPB      | LEV, OXC, LTG | 2-3 per month        | 1 |



**Supplemental Table S3a.** List of autopsic specimens used for quantification of PARV+ neurons and the number of PARV+ neurons across hippocampal areas.

Below, each microscopic slide is listed under the ordinal number. Numbers in cells represent the number of PARV+ neurons in different slides (rows) across hippocampal regions (columns). \*N/A- not applicable

| Number of PARV+ neurons | hCA3 | gcl | FD-mol | FD-polyml | CA3 - pyl | CA2- pyl | CA1 - pyl |
|-------------------------|------|-----|--------|-----------|-----------|----------|-----------|
| <b>1.</b>               |      |     |        |           |           |          |           |
| A1-2                    | 3    | 0   | 1      | 6         | 1         | 2        | 4         |
| A1-6                    | 3    | 3   | 0      | 16        | 0         | 1        | 2         |
| A1-10                   | 3    | 3   | 3      | 6         | 2         | 2        | 7         |
| <b>2.</b>               |      |     |        |           |           |          |           |
| A7-3                    | 1    | 0   | 1      | 4         | 0         | 2        | 3         |
| A7-7                    | 3    | 3   | 2      | 5         | 3         | 4        | 5         |
| A7-11                   | 3    | 1   | 5      | 7         | 4         | 2        | 3         |
| <b>3.</b>               |      |     |        |           |           |          |           |
| A1-3                    | 3    | 2   | 3      | 14        | 2         | 6        | 7         |
| A1-7                    | 3    | 5   | 0      | 13        | 2         | 2        | 6         |
| A1-11                   | 4    | 0   | 4      | 14        | 4         | 5        | 4         |
| <b>4.</b>               |      |     |        |           |           |          |           |
| A2-2                    | 7    | 2   | 5      | 20        | 2         | 2        | 16        |
| A2-6                    | 5    | 8   | 3      | 19        | 4         | 2        | 12        |
| A2-10                   | 9    | 10  | 6      | 20        | 4         | 4        | 9         |
| <b>5.</b>               |      |     |        |           |           |          |           |
| A18-12                  | 0    | 0   | 0      | 4         | 1         | 4        | 5         |
| A18-11                  | 0    | 1   | 0      | 2         | 1         | 3        | 4         |
| <b>6.</b>               |      |     |        |           |           |          |           |
| B1-2                    | 10   | 5   | 5      | 6         | 3         | 5        | 9         |
| B1-6                    | 5    | 4   | 1      | 6         | 3         | 1        | 12        |
| B1-10                   | 8    | 5   | 2      | 11        | 2         | 3        | 15        |
| <b>7.</b>               |      |     |        |           |           |          |           |
| A15-2                   | 6    | 2   | 5      | 28        | 6         | 1        | 17        |
| A15-6                   | 14   | 0   | 7      | 22        | 5         | 8        | 13        |
| A15-10                  | 10   | 0   | 5      | 40        | 6         | 3        | 13        |
| <b>8.</b>               |      |     |        |           |           |          |           |
| A4-3                    | 0    | 2   | 0      | 6         | 1         | 3        | 13        |
| A4-7                    | 1    | 1   | 0      | 11        | 5         | 6        | 12        |
| A4-11                   | 3    | 0   | 1      | 11        | 2         | 2        | 20        |
| <b>9.</b>               |      |     |        |           |           |          |           |
| B1-2                    | 0    | 1   | 0      | 14        | N/A       | N/A      | 2         |
| B1-6                    | 3    | 0   | 1      | 8         | 4         | 0        | 0         |
| B1-10                   | 5    | 0   | 1      | 11        | 2         | 2        | 2         |
| <b>10.</b>              |      |     |        |           |           |          |           |
| B6-2                    | 2    | 1   | 2      | 4         | 1         | 1        | 4         |

Below, each microscopic slide is listed under the ordinal number. Numbers in cells represent the number of PARV+ neurons in different slides (rows) across hippocampal regions (columns). N/A- not applicable

| Number of PARV+ neurons | hCA3 | gcl | FD-mol | FD-polyml | CA3 - pyl | CA 2- pyl | CA1 - pyl |
|-------------------------|------|-----|--------|-----------|-----------|-----------|-----------|
| 1.                      |      |     |        |           |           |           |           |
| 7                       | 5    | 0   | 0      | 0         | 3         | 0         | 0         |
| 11                      | 5    | 3   | 0      | 0         | 1         | 0         | 0         |
| 15                      | 3    | 0   | 0      | 0         | 0         | 0         | 0         |
| 2.                      |      |     |        |           |           |           |           |
| 1                       | 0    | 0   | 0      | 0         | 0         | 0         | 0         |
| 5                       | 0    | 0   | 0      | 0         | 1         | 0         | 0         |
| 9                       | 0    | 0   | 0      | 0         | 0         | 0         | 0         |
| 13                      | 0    | 0   | 0      | 0         | 0         | 0         | 0         |
| 17                      | 0    | 0   | 0      | 0         | 0         | 0         | 0         |
| 3.                      |      |     |        |           |           |           |           |
| 13                      | 7    | 10  | 8      | 0         | 3         | 1         | 3         |
| 17                      | 15   | 5   | 6      | 0         | 3         | 5         | 7         |
| 7                       | 7    | 0   | 6      | 0         | 0         | 0         | 3         |
| 11                      | 8    | 2   | 3      | 0         | N/A       | N/A       | 4         |
| 15                      | 7    | 2   | 4      | 1         | 3         | 3         | 5         |
| 19                      | 8    | 1   | 6      | 0         | 0         | 0         | 0         |
| 4.                      |      |     |        |           |           |           |           |
| 7                       | 5    | 1   | 0      | 0         | 0         | 0         | 0         |
| 8                       | 2    | 1   | 0      | 0         | 0         | 0         | 1         |
| 20                      | 1    | 1   | 0      | 0         | 0         | 0         | 1         |
| 5.                      |      |     |        |           |           |           |           |
| 1                       | 1    | 2   | 0      | 0         | 0         | 0         | 1         |
| 9                       | 0    | 4   | 0      | 0         | 0         | 6         | 0         |
| 8                       | 0    | 1   | 0      | 0         | 3         | N/A       | 0         |
| 19                      | 0    | 3   | 0      | 0         | 0         | 0         | 0         |
| 6.                      |      |     |        |           |           |           |           |
| 1                       | 5    | 0   | 0      | 0         | 0         | 2         | 0         |
| 5                       | 10   | 0   | 0      | 0         | 0         | 0         | 0         |
| 9                       | 6    | 1   | 0      | 0         | 0         | 2         | 1         |
| 13                      | 4    | 0   | 0      | 0         | 0         | 0         | 0         |
| 17                      | 4    | 2   | 0      | 0         | 0         | 0         | 0         |
| 7.                      |      |     |        |           |           |           |           |
| 1                       | 3    | 0   | 0      | 0         | N/A       | N/A       | N/A       |
| 9                       | 1    | 0   | 0      | 0         | 2         | N/A       | N/A       |
| 17                      | 0    | 0   | 0      | 0         | N/A       | N/A       | N/A       |
| 8                       | N/A  | N/A | N/A    | N/A       | N/A       | N/A       | N/A       |
| 8.                      |      |     |        |           |           |           |           |

|            |     |     |     |     |     |     |     |
|------------|-----|-----|-----|-----|-----|-----|-----|
| 9          | 0   | 0   | 1   | 0   | 3   | 0   | 1   |
| 7          | 4   | 1   | 0   | 0   | 0   | 0   | 1   |
| 15         | 5   | 2   | 0   | 0   | 1   | 0   | 0   |
| <b>9.</b>  |     |     |     |     |     |     |     |
| 1          | 4   | 3   | 2   | 2   | 1   | 1   | 1   |
| 5          | 3   | 1   | 0   | 0   | N/A | N/A | N/A |
| 13         | 5   | 9   | 0   | 0   | N/A | N/A | 5   |
| 17         | 1   | 4   | 0   | 0   | N/A | N/A | 2   |
| 11         | N/A |
| <b>10.</b> |     |     |     |     |     |     |     |
| 1          | 0   | 0   | 0   | 0   | 0   | 0   | 0   |
| 17         | 0   | 0   | 0   | 0   | 0   | 0   | 0   |
| 16         | 0   | 1   | 0   | 0   | 0   | 0   | 0   |
| <b>11.</b> |     |     |     |     |     |     |     |
| 1          | 4   | 3   | 1   | 0   | 0   | 0   | 0   |
| 5          | 3   | 0   | 0   | 0   | 1   | 0   | 1   |
| 13         | 0   | 1   | 0   | 0   | 0   | 0   | 0   |
| 17         | 2   | 0   | 0   | 0   | 1   | N/A | N/A |
| <b>12.</b> |     |     |     |     |     |     |     |
| 7          | 2   | 0   | 0   | 0   | 8   | 10  | 0   |
